# Supplementary material for: MOMENT – Management of Otitis Media with Effusion in Cleft Palate: protocol for a systematic review of the literature and identification of a core outcome set using a Delphi survey
Source: PubMed Central journal article supplement (PMC3716725; doi:10.1186/1745-6215-14-70), 2013-03-12
Supplement: 1745-6215-14-70-S1.pdf [file 1745-6215-14-70-S1.pdf]

## Additional File 1. Systematic review search strategies.

### CENTRAL via OVID search strategy

2006-14/04/2011

- #1 MeSH descriptor cleft palate explode all trees 92
- #2 MeSH descriptor cleft lip explode all trees 69
- #3 (cleft\* in All Text near/6 palate\* in All Text) 176
- #4 (cleft\* in All Text near/6 lip\* in All Text) 131
- #5 "hare lip\*" in All Text 2
- #6 harelip\* in All Text 2
- #7 Palatoschisis in All Text 1
- #8 (orofacial\* in All Text near/6 cleft\* in All Text) 6
- #9 (facial\* in All Text near/6 cleft\* in All Text) 13
- #10 (face\* in All Text near/6 cleft\* in All Text) 7
- #11 (#1 or #2 or #3 or #4 or #5 or #6 or #7 or #8 or #9 or #10) 204
- #12 MeSH descriptor middle ear ventilation explode all trees 200
- #13 MeSH descriptor otitis media explode all trees 820
- #14 grommet\* in All Text 72
- #15 (ear in All Text near/6 ventilat\* in All Text) 232
- #16 otitis next media in All Text 1527
- #17 (ventilat\* in All Text near/6 tube\* in All Text) 408
- #18 tympanostom\* in All Text 135
- #19 (glue in All Text near/6 ear\* in All Text) 65
- #20 (#12 or #13 or #14 or #15 or #16 or #17 or #18 or #19) 1908
- #21 (#11 and #20) 17

### CINAHL search strategy

Via OVID (1982 to February Week 2 2006)

- 1 Cleft Palate/ (686)
- 2 Cleft Lip/ (526)
- 3 (cleft\$ adj3 lip\$).tw. (495)
- 4 (cleft\$ adj3 palat\$).tw. (617)
- 5 hare lip\$.tw. (1)
- 6 harelip\$.tw. (0)
- 7 Palatoschisis.tw. (0)
- 8 (orofacial\$ adj3 cleft\$).tw. (29)
- 9 (facial adj3 cleft\$).tw. (40)
- 10 (oral adj3 cleft\$).tw. (49)
- 11 (craniofacial adj3 cleft\$).tw. (47)
- 12 or/1-11 (817)
- 13 Middle Ear Ventilation/ (224)
- 14 exp Otitis Media/ (1259)
- 15 grommet\$.tw. (21)
- 16 (ear\$ adj3 ventilat\$).tw. (80)
- 17 otitis media.tw. (898)
- 18 (ventilat\$ adj3 tube\$).tw. (99)
- 19 tympanostom\$.tw. (90)

- 20 (glue adj3 ear\$.tw. (32)  
 21 or/13-20 (1634)  
 22 21 and 12 (17)  
 23 from 22 keep 1-17 (17)

Via EBSCO (February Week 2 2006 -13/04/2011)

|    | Cinahl Ovid               |                  |         | Cinahl Ebsco           |           |                         |                           |
|----|---------------------------|------------------|---------|------------------------|-----------|-------------------------|---------------------------|
|    | Keyword                   | Field            | Results | Keyword                | Field     | Results 1982 to current | Results for 1982-Feb 2006 |
| 1  | Cleft Palate              | Thesaurus        | 686     | Cleft Palate           | Thesaurus | 1436                    | 751                       |
| 2  | Cleft Lip                 | Thesaurus        | 526     | Cleft Lip              | Thesaurus | 1099                    | 567                       |
| 3  | cleft\$ adj3 lip\$        | Text Word (.tw.) | 495     | Cleft* N3 lip*         | TI, AB,IN | 995                     | 530                       |
| 4  | cleft\$ adj3 palat\$      | Text Word (.tw.) | 617     | Cleft* N3 palat*       | TI, AB,IN | 1232                    | 663                       |
| 5  | hare lip\$                | Text Word (.tw.) | 1       | hare lip*              | TI, AB,IN | 1                       | 1                         |
| 6  | harelip\$                 | Text Word (.tw.) | 0       | Harelip*               | TI, AB,IN | 0                       | 0                         |
| 7  | Palatoschisis             | Text Word (.tw.) | 0       | Palatoschisis          | TI, AB,IN | 1                       | 1                         |
| 8  | orofacial\$ adj3 cleft\$  | Text Word (.tw.) | 29      | Orofacial* N3 cleft*   | TI, AB,IN | 93                      | 33                        |
| 9  | facial adj3 cleft\$       | Text Word (.tw.) | 40      | facial N3 cleft*       | TI, AB,IN | 69                      | 40                        |
| 10 | oral adj3 cleft\$         | Text Word (.tw.) | 49      | oral N3 cleft*         | TI, AB,IN | 115                     | 50                        |
| 11 | craniofacial adj3 cleft\$ | Text Word (.tw.) | 47      | craniofacial N3 cleft* | TI, AB,IN | 74                      | 45                        |
| 12 | or/1-11                   |                  | 817     | or/1-11                |           | 1741                    | 889                       |
| 13 | Middle Ear Ventilation    | Thesaurus        | 224     | Middle Ear Ventilation | Thesaurus | 410                     | 264                       |
| 14 | exp Otitis Media          | Thesaurus        | 1259    | exp Otitis Media       | Thesaurus | 2403                    | 1467                      |
| 15 | grommet\$                 | Text Word (.tw.) | 21      | grommet*               | TI, AB,IN | 49                      | 28                        |
| 16 | ear\$ adj3 ventilat\$     | Text Word (.tw.) | 80      | ear* N3 ventilat*      | TI, AB,IN | 158                     | 75                        |
| 17 | otitis media              | Text Word (.tw.) | 898     | otitis media           | TI, AB,IN | 1646                    | 1104                      |
| 18 | ventilat\$ adj3 tube\$    | Text Word (.tw.) | 99      | ventilat* N3 tube*     | TI, AB,IN | 266                     | 166                       |
| 19 | tympanostom\$             | Text Word (.tw.) | 90      | tympanostom*           | TI, AB,IN | 171                     | 110                       |
| 20 | glue adj3 ear\$           | Text Word (.tw.) | 32      | glue N3 ear*           | TI, AB,IN | 42                      | 33                        |
| 21 | or/13-20                  |                  | 1634    | or/13-20               |           | 3210                    |                           |
| 22 | 21 and 12                 |                  | 17      | 21 and 12              |           | 36                      |                           |
| 23 | from 22 keep 1-17         |                  | 17      | from 22 keep 1-17      |           |                         |                           |

## EMBASE via OVID Search strategy

2006-14/04/2011

- 1 cleft lip/ (3181)
- 2 Cleft Palate/ (5513)
- 3 Cleft Lip Face Palate/ (257)
- 4 Cleft Lip Palate/ (931)
- 5 (cleft\$ adj3 lip\$).tw. (4006)
- 6 (cleft\$ adj3 palat\$).tw. (5885)
- 7 hare lip\$.tw. (23)
- 8 harelip\$.tw. (31)
- 9 Palatoschisis.tw. (25)
- 10 (orofacial\$ adj3 cleft\$).tw. (243)
- 11 (facial adj3 cleft\$).tw. (675)
- 12 (oral adj3 cleft\$).tw. (290)
- 13 (craniofacial adj3 cleft\$).tw. (259)
- 14 or/1-13 (9179)
- 15 middle ear ventilation/ (238)
- 16 exp Otitis Media/ (13078)
- 17 tympanostomy tube/ (1111)
- 18 grommet\$.tw. (305)
- 19 (ear\$ adj3 ventilat\$).tw. (901)
- 20 otitis media.tw. (9424)
- 21 (ventilat\$ adj3 tube\$).tw. (1075)
- 22 tympanostom\$.tw. (640)
- 23 (glue adj3 ear\$).tw. (216)
- 24 or/15-23 (16372)
- 25 14 and 24 (206)
- 26 from 25 keep 1-206 (206)

## Medline via OVID search strategy

2006-14/04/2011

- 1 Cleft Palate/ (11628)
- 2 Cleft Lip/ (8131)
- 3 (cleft\$ adj3 lip\$).tw. (6156)
- 4 (cleft\$ adj3 palat\$).tw. (8901)
- 5 hare lip\$.tw. (68)
- 6 harelip\$.tw. (99)
- 7 Palatoschisis.tw. (69)
- 8 (orofacial\$ adj3 cleft\$).tw. (280)
- 9 (facial adj3 cleft\$).tw. (759)
- 10 (oral adj3 cleft\$).tw. (326)
- 11 (craniofacial adj3 cleft\$).tw. (213)
- 12 or/1-11 (15658)

13 Middle Ear Ventilation/ (1469)  
14 exp Otitis Media/ (15239)  
15 grommet\$.tw. (336)  
16 (ear\$ adj3 ventilat\$).tw. (616)  
17 otitis media.tw. (10785)  
18 (ventilat\$ adj3 tube\$).tw. (1163)  
19 tympanostom\$.tw. (651)  
20 (glue adj3 ear\$).tw. (273)  
21 or/13-20 (18849)  
22 21 and 12 (297)  
23 exp animals/ not human/ (2948249)  
24 22 not 23 (286)  
25 22 not 24 (11)  
26 from 25 keep 1-11 (11)
