# Supplementary material for: MOMENT – Management of Otitis Media with Effusion in Cleft Palate: protocol for a systematic review of the literature and identification of a core outcome set using a Delphi survey
Source: Trials. 2013 Mar 12;14:70. doi: 10.1186/1745-6215-14-70 (PMC3716725; doi:10.1186/1745-6215-14-70)
Supplement: Additional file 4 — Online system screenshots. [file 1745-6215-14-70-S4.pdf]

## Additional Document 4 -Online System Screenshots

http://cfc.org.uk/staging/www.moment.org.uk/Register.aspx?logType=register - Windows Internet Explorer

File Edit View Favorites Tools Help

Search Safe Do Not Track Weather Facebook Speedtest

Web Slice Gallery Add to Wish List

http://cfc.org.uk/staging/www.moment.org.uk/

**Delphi Study** [Site Map](#)

[Testing] Register:

Welcome to the MOMENT study, to take part in the online Delphi please register by entering your information below. Registration will generate a unique identifier that will be used in future rounds.  
Your responses will be stored anonymously against your unique identifier only.

First Name

Last Name

Email Address

Cleft Centre

What is your clinical role?

If you have already registered please enter your email and unique id to enter the study

Unique id

Email Address

[Forgotten Id?](#)

Registration

http://cfc.org.uk/staging/www.moment.org.uk/Round2/R2Page1.aspx - Windows Internet Explorer

File Edit View Favorites Tools Help

Search Safe Do Not Track Weather Facebook Speedtest

Web Slice Gallery Add to Wish List

http://cfc.org.uk/staging/www.moment.org.uk/

[Testing] Delphi Study Round 1

Unique ID: MC154815

Thank you for registering to take part in the MOMENT Delphi study.

In this study we are aiming to find out which outcomes of research are important to clinicians and should be included in a core outcome set for future studies of clefts media with effusion in children with cleft palate.

We have carried out a systematic review to identify outcomes that have been used in previous studies and also asked our study advisory group of experts for their opinion. The outcomes identified are listed below. We would like you to review this list and score the importance of each outcome to you, as a clinician, when you consider this question.

What outcomes influence your management of children with cleft palate, with, or at high risk of, clefts media with effusion (OME)?

Please review the outcomes listed and score their importance in your management of children with cleft palate and clefts media with effusion, with 1 being not important and 9 being critical. Outcomes have been listed in alphabetical order.

Please enter a score for all outcomes. If you feel unable to comment based on your clinical experience please select 'Unable to Score'.

When you are reviewing the outcomes list please remember that at this stage we are only interested in what should be measured. The methodology and timing of assessments will be reviewed later, once the core outcome set has been identified.

If you would like clarification on an outcome please hold your cursor over the outcome and a text box will be displayed when additional information is available.

There may be other outcomes that might be beneficial or harmful, short term or long term that you find clinically most important. If you would like to add any outcomes to the list please add them in the space provided at the bottom of the page.

At any time you wish to log out and return to your answers at a later date please use the 'Save for later' button at the bottom of the page.

Please also note that the online Delphi will close out after 60 minutes and so please remember to save your scores.

| Outcome                                  | Importance    |                            |          |   |   |   |   |   |   | Unable to Score |
|------------------------------------------|---------------|----------------------------|----------|---|---|---|---|---|---|-----------------|
|                                          | Not important | Important but not critical | Critical |   |   |   |   |   |   |                 |
|                                          | 1             | 2                          | 3        | 4 | 5 | 6 | 7 | 8 | 9 |                 |
| Outcomes related to chronic otitis media |               |                            |          |   |   |   |   |   |   |                 |
| Hearing                                  |               |                            |          |   |   |   |   |   |   |                 |
| Speech                                   |               |                            |          |   |   |   |   |   |   |                 |
| Communication                            |               |                            |          |   |   |   |   |   |   |                 |
| Social interaction                       |               |                            |          |   |   |   |   |   |   |                 |
| Self-esteem                              |               |                            |          |   |   |   |   |   |   |                 |
| Quality of life                          |               |                            |          |   |   |   |   |   |   |                 |
| Parental/carer experience                |               |                            |          |   |   |   |   |   |   |                 |
| Family functioning                       |               |                            |          |   |   |   |   |   |   |                 |

Example of outcomes list

http://cfc.org.uk/staging/www.moment.org.uk/Round2/R2Page1.aspx - Windows Internet Explorer

File Edit View Favorites Tools Help

Search Safe Do Not Track Weather Facebook Speedtest

Web Slice Gallery Add to Wish List

http://cfc.org.uk/staging/www.moment.org.uk/

[Testing] Delphi Study Round 1

Unique ID: MC154815

Thank you for registering to take part in the MOMENT Delphi study.

In this study we are aiming to find out which outcomes of research are important to clinicians and should be included in a core outcome set for future studies of clefts media with effusion in children with cleft palate.

We have carried out a systematic review to identify outcomes that have been used in previous studies and also asked our study advisory group of experts for their opinion. The outcomes identified are listed below. We would like you to review this list and score the importance of each outcome to you, as a clinician, when you consider this question.

What outcomes influence your management of children with cleft palate, with, or at high risk of, clefts media with effusion (OME)?

Please review the outcomes listed and score their importance in your management of children with cleft palate and clefts media with effusion, with 1 being not important and 9 being critical. Outcomes have been listed in alphabetical order.

Please enter a score for all outcomes. If you feel unable to comment based on your clinical experience please select 'Unable to Score'.

When you are reviewing the outcomes list please remember that at this stage we are only interested in what should be measured. The methodology and timing of assessments will be reviewed later, once the core outcome set has been identified.

If you would like clarification on an outcome please hold your cursor over the outcome and a text box will be displayed when additional information is available.

There may be other outcomes that might be beneficial or harmful, short term or long term that you find clinically most important. If you would like to add any outcomes to the list please add them in the space provided at the bottom of the page.

At any time you wish to log out and return to your answers at a later date please use the 'Save for later' button at the bottom of the page.

Please also note that the online Delphi will close out after 60 minutes and so please remember to save your scores.

| Outcome                                  | Importance    |                            |          |   |   |   |   |   |   | Unable to Score |
|------------------------------------------|---------------|----------------------------|----------|---|---|---|---|---|---|-----------------|
|                                          | Not important | Important but not critical | Critical |   |   |   |   |   |   |                 |
|                                          | 1             | 2                          | 3        | 4 | 5 | 6 | 7 | 8 | 9 |                 |
| Outcomes related to chronic otitis media |               |                            |          |   |   |   |   |   |   |                 |
| Hearing                                  |               |                            |          |   |   |   |   |   |   |                 |
| Speech                                   |               |                            |          |   |   |   |   |   |   |                 |
| Communication                            |               |                            |          |   |   |   |   |   |   |                 |
| Social interaction                       |               |                            |          |   |   |   |   |   |   |                 |
| Self-esteem                              |               |                            |          |   |   |   |   |   |   |                 |
| Quality of life                          |               |                            |          |   |   |   |   |   |   |                 |
| Parental/carer experience                |               |                            |          |   |   |   |   |   |   |                 |
| Family functioning                       |               |                            |          |   |   |   |   |   |   |                 |

**Additional Outcomes**

If you would like to add an outcome to the list please enter the outcome in the space provided below. For the outcome that you add please also provide a score (1-9). After you have entered and scored your outcome please press the add outcome button. The outcome will be added to the list of your outcomes and you will be able to add another outcome if you would like to.

| Outcome Description  | Importance    |                            |          |   |   |   |   |   |   | Delete |
|----------------------|---------------|----------------------------|----------|---|---|---|---|---|---|--------|
|                      | Not important | Important but not critical | Critical |   |   |   |   |   |   |        |
|                      | 1             | 2                          | 3        | 4 | 5 | 6 | 7 | 8 | 9 |        |
| additional outcome 2 |               |                            |          |   |   |   |   |   |   |        |
|                      |               |                            |          |   |   |   |   |   |   |        |

**Your Additional Outcomes**

If you change your mind and do not want to add the outcome please select 'Delete' (note the outcome will still be visible but will not be saved).

| Outcome Description  | Importance    |                            |          |   |   |   |   |   |   | Delete |
|----------------------|---------------|----------------------------|----------|---|---|---|---|---|---|--------|
|                      | Not important | Important but not critical | Critical |   |   |   |   |   |   |        |
|                      | 1             | 2                          | 3        | 4 | 5 | 6 | 7 | 8 | 9 |        |
| additional outcome 1 |               |                            |          |   |   |   |   |   |   |        |
|                      |               |                            |          |   |   |   |   |   |   |        |

Thank you for completing Round 1 of the Delphi exercise.

Example of add additional outcomes function
